# Supplementary material
Source: PubMed Central journal article supplement (PMC7373224)
Supplement: NIHMS1609390-supplement-SI.pdf [file NIHMS1609390-supplement-SI.pdf]

# Supplementary Information for “A multiscale biophysical model for the recruitment of actin nucleating proteins at the membrane interface”

Ololade Fatunmbi, Ryan Bradley, Sreeja Kutti Kandy, Robert Bucki,  
Paul A Janmey and Ravi Radhakrishnan

## S1. Numerical solutions for reactions

The proposed two step reaction mechanism for mDia2, NWASP and gelsolin is given as:

- (i)  $F + M \rightleftharpoons FM$ ,  $N + M \rightleftharpoons NM$  and  $G + M \rightleftharpoons GM$   
 $K_{fm} = \frac{[FM]}{[F][M]}$ ,  $K_{nm} = \frac{[NM]}{[N][M]}$  and  $K_{gm} = \frac{[GM]}{[G][M]}$ .
- (ii)  $FM + n_1P \rightleftharpoons FMP_{n_1}$ ,  $NM + n_2P \rightleftharpoons NMP_{n_2}$  and  $GM + n_3P \rightleftharpoons GMP_{n_3}$   
 $K_{f_p} = \frac{[FMP_{n_1}]}{[FM][P]^{n_1}}$ ,  $K_{n_p} = \frac{[NMP_{n_2}]}{[NM][P]^{n_2}}$  and  $K_{g_p} = \frac{[GMP_{n_3}]}{[GM][P]^{n_3}}$ .

The rates of reactions for mDia2 can be written as:

$$\begin{aligned} \frac{d[FM]}{dt} &= K_{on}^{fm}[F][M] - K_{off}^{fm}[FM] - \frac{d[FMP_{n_1}]}{dt} \\ &= K_{on}^{fm} ([F]_{tot} - [FM] - [FMP_{n_1}]) \\ &\quad ([M]_{tot} - [FM] - [FMP_{n_1}] - [NM] - [NMP_{n_2}] - [GM] - [GMP_{n_3}]) \\ &\quad - K_{off}^{fm}[FM] - \frac{d[FMP_{n_1}]}{dt} \end{aligned} \quad (S1)$$

and

$$\begin{aligned} \frac{d[FMP_{n_1}]}{dt} &= K_{on}^{f_p}[FM][P]^{n_1} - K_{off}^{f_p}[FMP_{n_1}] \\ &= K_{on}^{f_p}[FM] ([P]_{tot} - n_1[FMP_{n_1}] - n_2[NMP_{n_2}] - n_3[GMP_{n_3}])^{n_1} - K_{off}^{f_p}[FMP_{n_1}], \end{aligned} \quad (S2)$$

where  $K_{on}$  and  $K_{off}$  represent the forward and reverse reaction rate constants. At equilibrium  $K_{\alpha\beta} = K_{on}^{\alpha\beta}/K_{off}^{\alpha\beta}$  with  $\alpha = f, n, g$  and  $\beta = m, p$ .

At equilibrium,

$$\frac{d[FM]}{dt} = \frac{d[FMP_{n_1}]}{dt} = 0 \quad (S3)$$

Substituting this in equations S1 and S2:

$$\begin{aligned} K_{on}^{fm} ([F]_{tot} - [FM] - [FMP_{n_1}]) ([M]_{tot} - [FM] - [FMP_{n_1}] - [NM] - [NMP_{n_2}] - [GM] - [GMP_{n_3}]) \\ - K_{off}^{fm}[FM] = 0 \end{aligned} \quad (S4)$$

and

$$K_{on}^{f_p}[FM] ([P]_{tot} - n_1[FMP_{n_1}] - n_2[NMP_{n_2}] - n_3[GMP_{n_3}])^{n_1} - K_{off}^{f_p}[FMP_{n_1}] = 0. \quad (S5)$$

Substituting for  $K_{on}^{fm}/K_{off}^{fm}$  and  $K_{on}^{fp}/K_{off}^{fp}$ :

$$K_{fm} ([F]_{tot} - [FM] - [FMP_{n_1}]) ([M]_{tot} - [FM] - [FMP_{n_1}] - [NM] - [NMP_{n_2}] - [GM] - [GMP_{n_3}]) - [FM] = 0 \quad (S6)$$

and

$$K_{fp}[FM] ([P]_{tot} - n_1[FMP_{n_1}] - n_2[NMP_{n_2}] - n_3[GMP_{n_3}])^{n_1} - [FMP_{n_1}] = 0. \quad (S7)$$

Similarly we can write the equations for NWASP as:

$$K_{nm} ([N]_{tot} - [NM] - [NMP_{n_2}]) ([M]_{tot} - [FM] - [FMP_{n_1}] - [NM] - [NMP_{n_2}] - [GM] - [GMP_{n_3}]) - [NM] = 0 \quad (S8)$$

and

$$K_{np}[NM] ([P]_{tot} - n_1[FMP_{n_1}] - n_2[NMP_{n_2}] - n_3[GMP_{n_3}])^{n_2} - [NMP_{n_2}] = 0 \quad (S9)$$

and the equations for gelsolin as:

$$K_{gm} ([G]_{tot} - [GM] - [GMP_{n_3}]) ([M]_{tot} - [FM] - [FMP_{n_1}] - [NM] - [NMP_{n_2}] - [GM] - [GMP_{n_3}]) - [GM] = 0 \quad (S10)$$

and

$$K_{gp}[GM] ([P]_{tot} - n_1[FMP_{n_1}] - n_2[NMP_{n_2}] - n_3[GMP_{n_3}])^{n_3} - [GMP_{n_2}] = 0 \quad (S11)$$

Solving equations **S6** to **S11** numerically we obtain  $[FMP_{n_1}]$ ,  $[NMP_{n_2}]$  and  $[GMP_{n_3}]$  as a function of  $[P]_{tot}$ .

The Hill coefficients  $n_1 = 4$ ,  $n_2 = 5$  and  $n_3 = 4$  are obtained from molecular simulations. For mDia2 we take association constants  $K_{fm} = 60/\mu M$  and  $K_{fp} = 0.0001/\mu M^{n_1}$  (i.e., dissociation constant  $K_{fp}^d = 10\mu M$ ) [1]. For NWASP, we take  $K_{np} = 0.0037/\mu M^{n_2}$  (i.e.,  $K_{np}^d = 3.07\mu M$ ) [2] and  $K_{nm} = K_{fm}$ . For gelsolin we take  $K_{gm} = 0.01/\mu M$  and  $K_{gp} = 0.0001/\mu M^{n_3}$  (i.e.,  $K_{gp}^d = 5\mu M$ ). The reported dissociation constants for gelsolin varies from 2 – 20 $\mu M$  [3], hence in the section S2 we describe the effect of varying  $K_{gm}^d$ . The membrane binding site concentration is taken to be  $[M_{tot}] = 10\mu M$ .

## S2. Bound and free gelsolin for different gelsolin dissociation constants

Here we vary gelsolin dissociation constants  $K_{gp}^d$  as 2 $\mu M$ , 5 $\mu M$  and 10 $\mu M$  when  $K_{gm} = K_{fm} = 60/\mu M$  and  $K_{gp} = 0.01/\mu M$ .

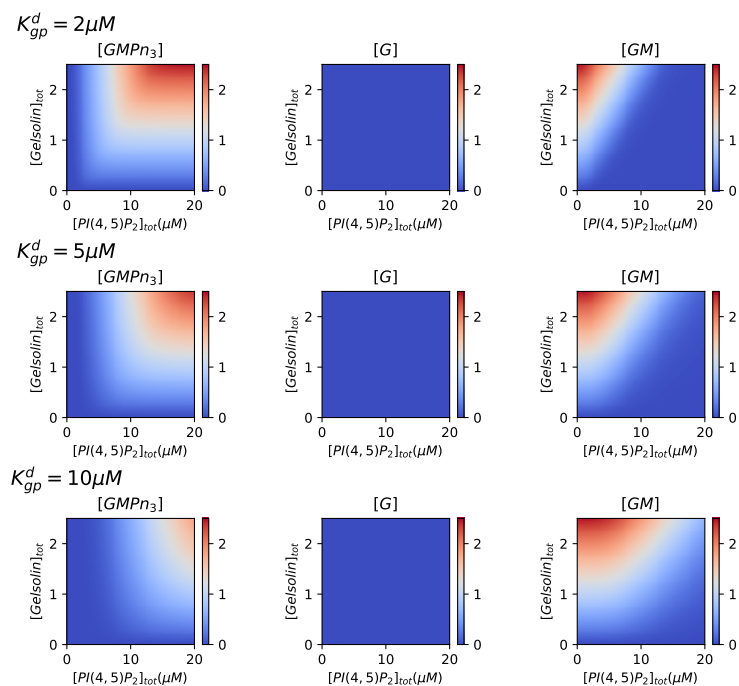

**Figure S1.** Effect of dissociation constant in gelsolin binding when  $K_{gm} = 60/\mu M$ .

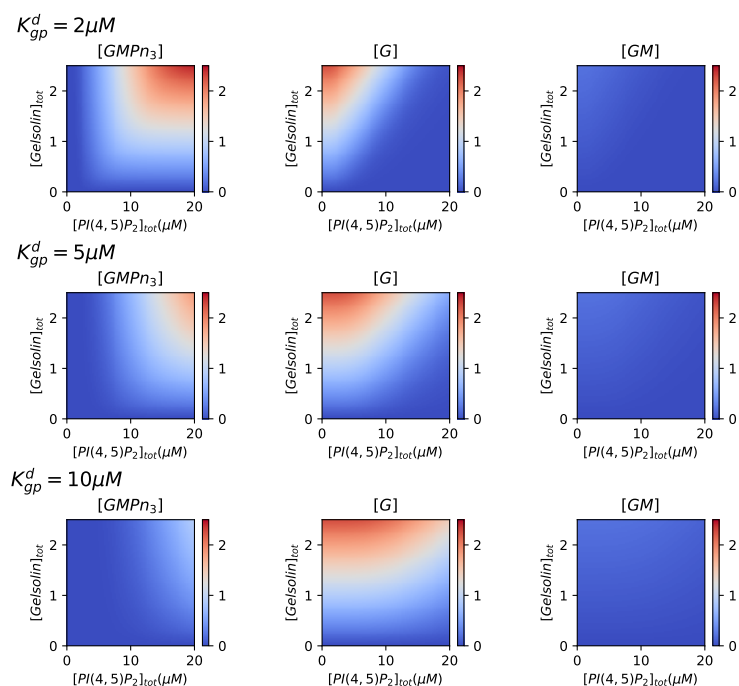

**Figure S2.** Effect of dissociation constant in gelsolin binding when  $K_{gm} = 0.01/\mu M$ .

## References

- [1] Bucki R, Wang Y H, Yang C, Kandy S K, Fatunmbi O, Bradley R, Pogoda K, Svitkina T, Radhakrishnan R and Janmey P A 2019 *Journal of Biological Chemistry* **294** 4704–4722

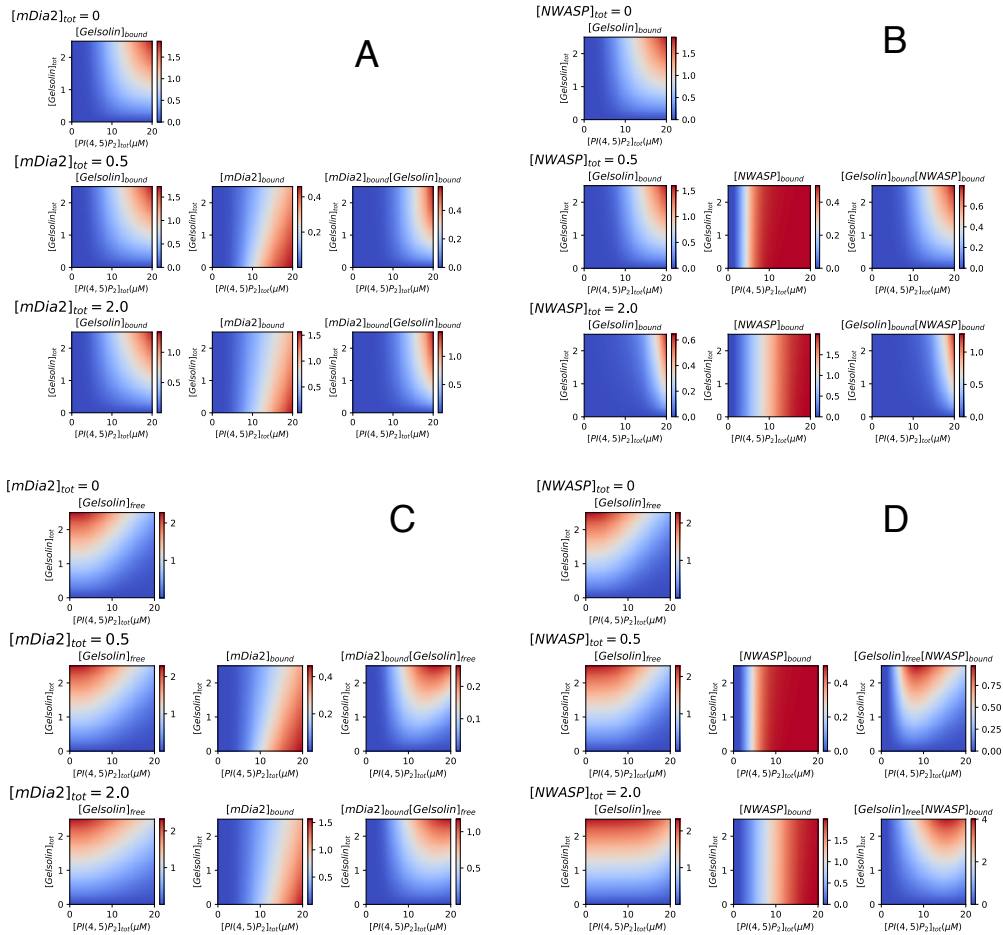

**Figure S3.** A. Concentration of bound gelsolin and mDia2 as a function of PI(4,5)P<sub>2</sub> and gelsolin at different mDia2 concentrations in the absence of NWASP when  $K_{gm}^d = 100\mu M$ ,  $K_{gp}^d = 5\mu M$ ,  $K_{fm}^d = 0.017\mu M$ ,  $K_{fp}^d = 10\mu M$  and  $M_{tot} = 10$ . B. Concentration of bound gelsolin and NWASP as a function of PI(4,5)P<sub>2</sub> and gelsolin at different NWASP concentrations in the absence of mDia2 when  $K_{gm}^d = 100\mu M$ ,  $K_{gp}^d = 5\mu M$ ,  $K_{nm}^d = 0.017\mu M$ ,  $K_{np}^d = 3.07\mu M$  and  $M_{tot} = 10$ . C. Concentration of free gelsolin and bound mDia2 as a function of PI(4,5)P<sub>2</sub> and gelsolin at different mDia2 concentrations in the absence of NWASP when  $K_{gm}^d = 100\mu M$ ,  $K_{gp}^d = 5\mu M$ ,  $K_{fm}^d = 0.017\mu M$ ,  $K_{fp}^d = 10\mu M$  and  $M_{tot} = 10$ . D. Concentration of free gelsolin and bound NWASP as a function of PI(4,5)P<sub>2</sub> and gelsolin at different NWASP concentrations in the absence of mDia2 when  $K_{gm}^d = 100\mu M$ ,  $K_{gp}^d = 5\mu M$ ,  $K_{nm}^d = 0.017\mu M$ ,  $K_{np}^d = 3.07\mu M$  and  $M_{tot} = 10$ .

(Preprint <http://www.jbc.org/content/294/12/4704.full.pdf+html>) URL <http://www.jbc.org/content/294/12/4704.abstract>

- [2] Papayannopoulos V, Co C, Prehoda K E, Snapper S, Taunton J and Lim W A 2005 *Molecular Cell* **17** 181 – 191 ISSN 1097-2765 URL <http://www.sciencedirect.com/science/article/pii/S1097276504007993>
- [3] Szatmari D, Xue B, Kannan B, Burtnick L D, Bugyi B, Nyitrai M and Robinson R C 2018 *PLOS ONE* **13** 1–17 URL <https://doi.org/10.1371/journal.pone.0201826>
